# Supplementary material
Source: publisher figshare collection journal article supplement (https://acs.figshare.com/ndownloader/files/10481782)
Supplement: Supplementary file 1 [file 10481782]

## SUPPORTING INFORMATION

### A Raman-Based Imaging Method for Characterizing the Molecular Adsorption and Spatial Distribution of Silver Nanoparticles on Hydrated Mineral Surfaces

Seth W. Brittle, Daniel P. Foose, Kevin A. O'Neil, Janice M. Sikon, Jasmine K. Johnson, Adam C. Stahler, John Ryan, Steven R. Higgins, and Ioana E. Sizemore\*

Department of Chemistry, Wright State University, 3640 Colonel Glenn Hwy., Dayton, OH, 45435

\*Corresponding author: [ioana.pavel@wright.edu](mailto:ioana.pavel@wright.edu)

This file has a total of 6 pages and consists of two tables (tables S1 and S2) and four figures (figures S1, S2, S3, and S4).

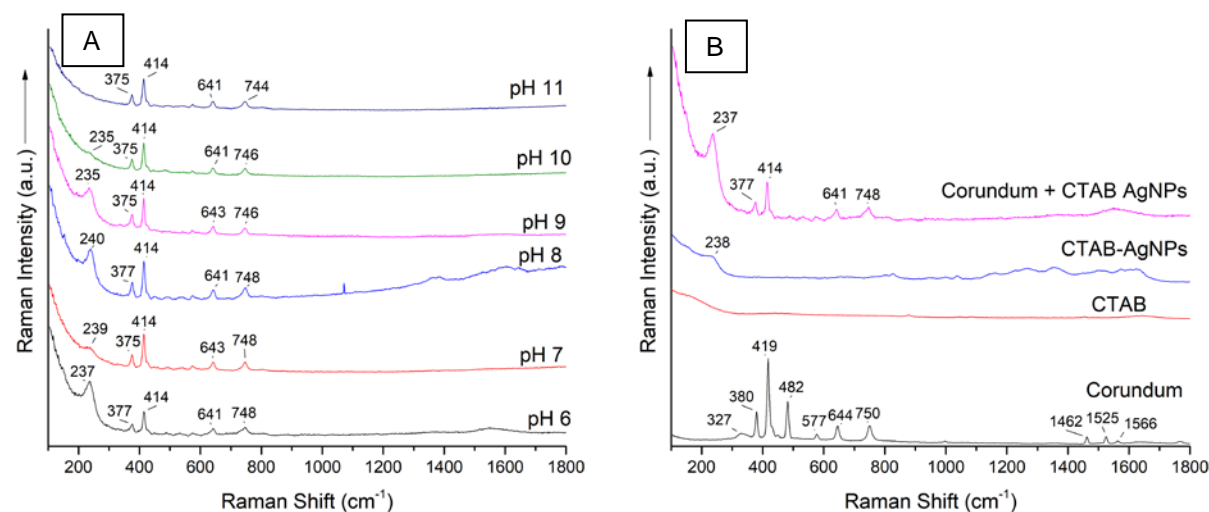

**Figure S1. A)** Raman spectra of micro-corundum exposed to 1 mg L<sup>-1</sup> of CTAB-capped AgNPs<sup>+</sup> with ISA for 30 min at all experimental pH values (6-11). **B)** Raman spectra of the same sample in comparison with the corresponding controls on corundum, CTAB, and CTAB-capped AgNPs<sup>+</sup>. Spectra were shifted for comparison reasons.

**Table S1:** Raman vibrational modes of muscovite control and their tentative assignments according to references 51-54 from the manuscript. The experimental reference spectrum was obtained with a 633 nm HeNe Laser and 1 s acquisition time.

| Literature Raman modes (cm <sup>-1</sup> ) | Experimental Raman modes (cm <sup>-1</sup> ) | Tentative Assignment                                          |
|--------------------------------------------|----------------------------------------------|---------------------------------------------------------------|
| 85                                         |                                              | Sheet yz-trans. + K y-trans.                                  |
| 124                                        | 122                                          | Sheet xz-trans. + K xy-trans. (minor)                         |
| 172                                        | 170                                          | M2-OH stretch (M2 z-trans.)                                   |
| 198                                        | 195                                          | M2-OH stretch + Od xz-trans.                                  |
| 217                                        | 215                                          | OH-M2-OH bend + M2-Oa stretch                                 |
| 265                                        | 267                                          | Ob, OH y-trans. + Oc,e z-trans. + K y-trans.                  |
| 265                                        |                                              | T1-Oa z-trans. + T2-Ob -z-trans. + M2 xy-trans. + K xy-trans. |
| 295                                        |                                              | M2-OH stretch + M2-Oa stretch                                 |
| 316                                        | 317                                          | M2-OH stretch + M2-Ob stretch + tetrahedral rot.    z         |
| 382                                        | 382, sh                                      | M2 z-trans. + Oc z-trans. + Od,e -z-trans.                    |
| 411                                        | 413                                          | M2 xz-trans. + Od z-trans. + Oc,e xz-trans.                   |
| 442                                        |                                              | Oa-M2-Ob bend + Oc,e z-trans. + Od xy-trans.                  |
| 527                                        |                                              | T-Obr-T xy-bend                                               |
| 583                                        |                                              | M2 xy-trans. + T z-trans.                                     |
| 583                                        |                                              | Od,e xy-trans. + T y-trans. + K xy-trans.                     |
| 638                                        | 638                                          | Onb yz-trans. + Obr -yz-trans.                                |
| 703                                        | 707                                          | Onb z-trans. + Ob r -z-trans. + M2-Ob stretch                 |
| 754                                        | 757                                          | Oa-M2-Ob bend                                                 |
| 800                                        |                                              | T-Oc,d-T bend                                                 |
| 811                                        |                                              | T-Oc,e-T bend                                                 |
| 913                                        | 915                                          | Tetrahedral breathing                                         |
| 958                                        | 959                                          | T-Onb stretch (n1)                                            |
| 1024                                       | 1020                                         | T-Onb stretch (n1) + Obr in/out tetr. base center             |
| 1098                                       | 1079                                         | T1,2-Oc,e xy-stretch (n10)                                    |
| 1116                                       | 1120                                         | T1,2-Oc,d xy-stretch (n10)                                    |

Abbreviations: M2 – Octahedral site occupied by Al<sup>3+</sup> (M1 site is vacant), T – Tetrahedral site, Onb - non-bridging O atoms, Obr - bridging O atoms, and sh – shoulder.

26 **Table S2.** Raman vibrational modes of corundum control and their tentative assignment  
 27 according to references 57-59 from manuscript.

| <b>Experimental<br/>Raman Modes (cm<sup>-1</sup>)</b> | <b>Literature<br/>Raman Modes (cm<sup>-1</sup>)</b> | <b>Tentative assignment</b> |
|-------------------------------------------------------|-----------------------------------------------------|-----------------------------|
| 378 (m)                                               | 379                                                 | $E_g$ external              |
| 416 (s)                                               | 417                                                 | $A_{1g}$                    |
| 429 (m,sh)                                            | 429                                                 | $E_g$ external              |
| 451 (w)                                               | 451                                                 | $E_g$ internal              |
| 574-576 (w)                                           | 576                                                 | $E_g$ internal              |
| 644 (m)                                               | 644                                                 | $A_{1g}$                    |
| 750 (m)                                               | 750                                                 | $E_g$ internal              |

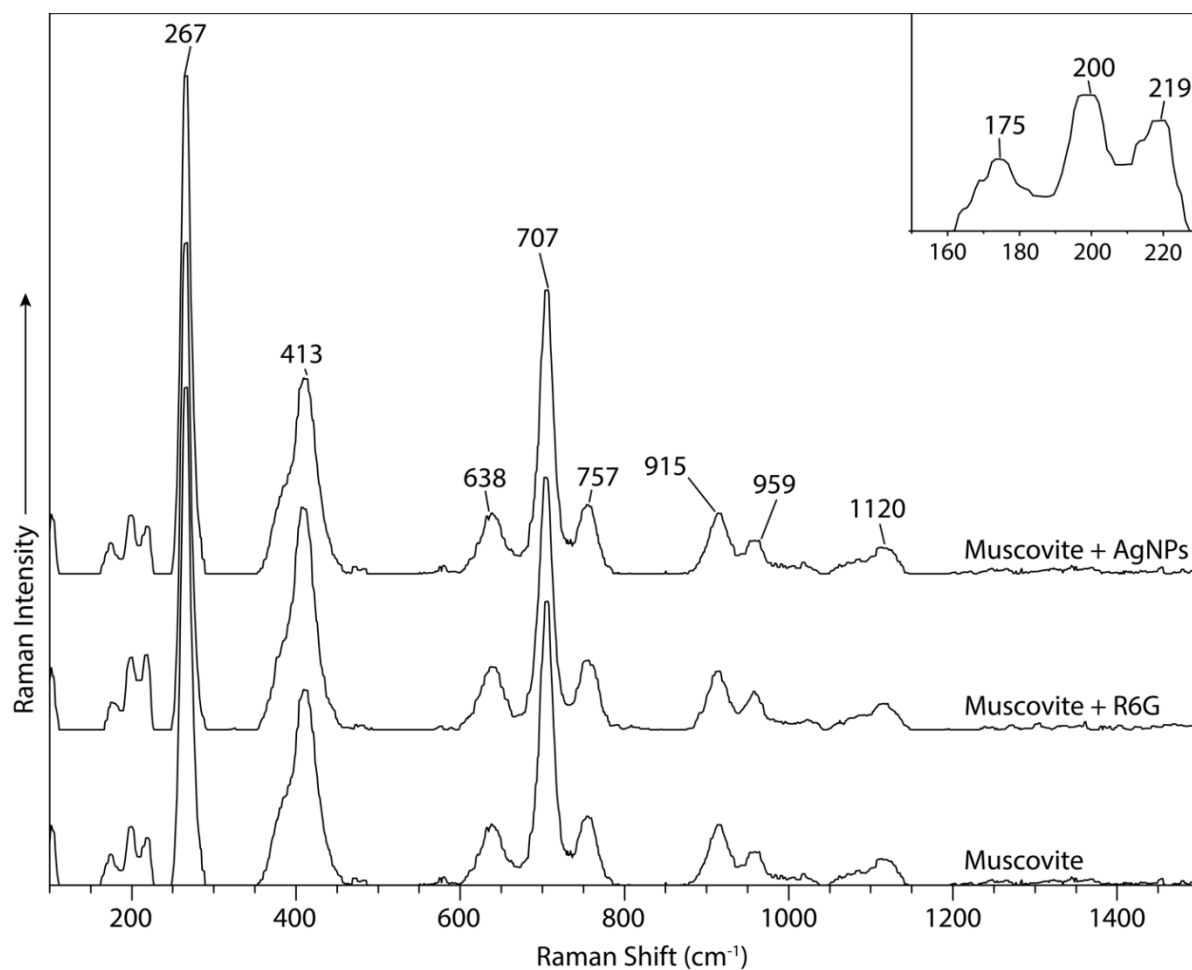

**Figure S2:** Representative Raman spectra of muscovite controls. No evidence of R6G or AgNPs<sup>-</sup> is present in the controls. The upper two spectra were shifted for comparison reasons. Inset displays the low  $\text{cm}^{-1}$  region.

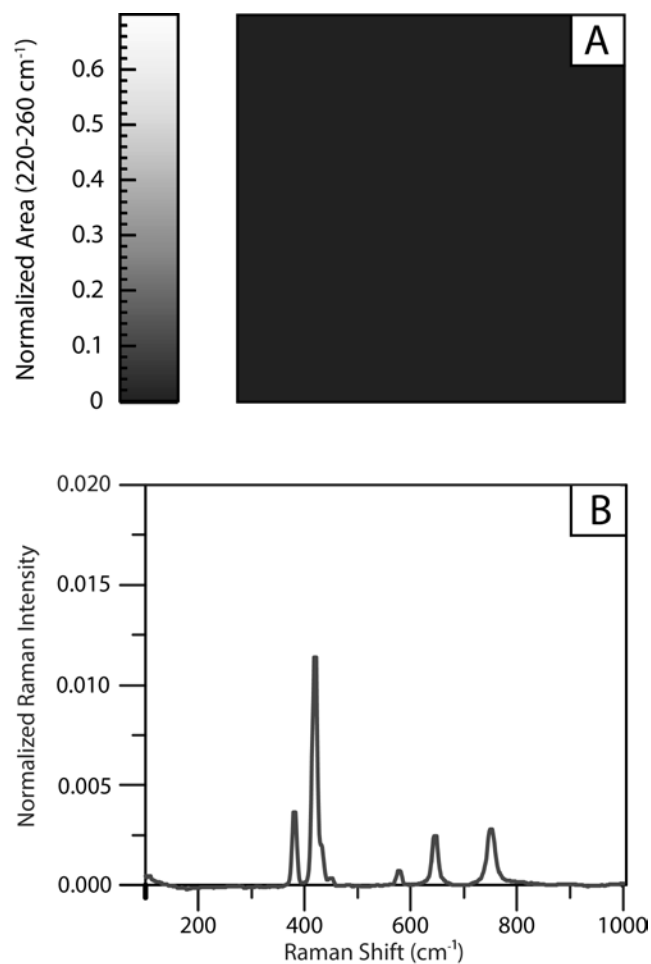

**Figure S3:** Raman image of a AgNP<sup>-</sup>-macro-corundum control window (52 μm x 52 μm) prepared by immersing corundum into 1 mg L<sup>-1</sup> of AgNPs<sup>-</sup> for 30 min. The color scale in (A) is the same as in Figure 2. There is no evidence of silver in any spectrum; only the characteristic peaks of corundum were detected.

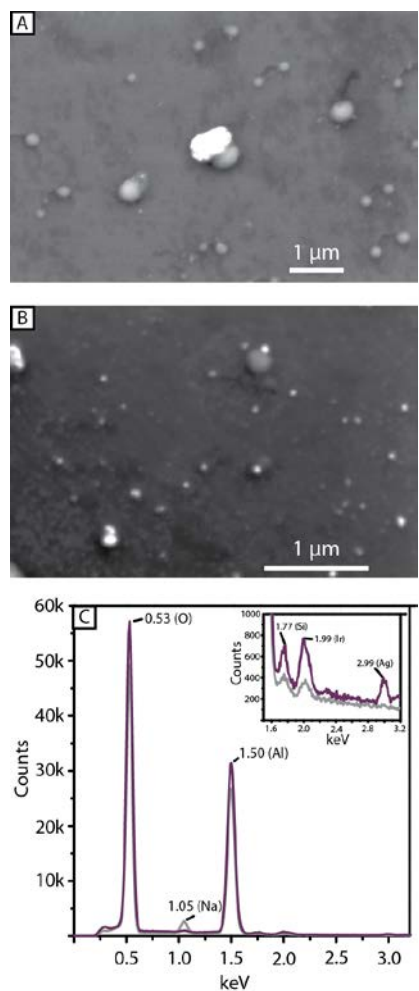

**Figure S4.** Backscattered SEM images of a macro-corundum window utilizing a backscatter, secondary electron detector. **A)** Mineral control with ISA (no AgNPs) leading to the formation of nano-sized features due to the ISA precipitation on the surface (large white spot in the center). **B)** Mineral sample with AgNPs<sup>-</sup> showing the absorption of AgNPs<sup>-</sup> onto the same window (smaller but more frequent white spots). **C)** EDX spectra collected from the described areas in images A) (silver gray spectrum) and B) (violet spectrum). The inset confirms the chemical nature of the Na (from image A) and Ag nanofeatures (from image B).
